# Supplementary material for: 14-3-3 Proteins and the Plasma Membrane H+-ATPase Are Involved in Maize (Zea mays) Magnetic Induction
Source: MDPI journal article supplement (doi:10.3390/plants12152887), 2023-08-07
Supplement: s1 [file s1]

## Supplementary Table S1. Primers used in this work

| Gene                                                              | Locus           | Sequence 5' → 3'         |         |
|-------------------------------------------------------------------|-----------------|--------------------------|---------|
| <i>ACT1</i> - actin1                                              | Zm00001d010159  | ATGGATTCCGGTGATGGTGT     | Forward |
| <i>ACT1</i> - actin1                                              | Zm00001d010159  | ACGTAGGCAAGCTTCTCCTT     | Reverse |
| <i>ACT1</i> - actin1                                              | Zm00001d010159  | GCAGCATGAAGGTTAAAGTGATTG | Forward |
| <i>ACT1</i> - actin1                                              | Zm00001d010159  | GCCACCGATCCAGACACTGT     | Reverse |
| <i>GAPC2</i> - glyceraldehyde-3-phosphate dehydrogenase2          | Zm00001d035156  | CACCGTGGATGTGTCAATTG     | Forward |
| <i>GAPC2</i> - glyceraldehyde-3-phosphate dehydrogenase2          | Zm00001d035156  | AAACCAGATCCTCTCCACG      | Reverse |
| <i>GAPC2</i> - glyceraldehyde-3-phosphate dehydrogenase2          | Zm00001d035156  | CATGCTGGTTTTGGACACGG     | Forward |
| <i>GAPC2</i> - glyceraldehyde-3-phosphate dehydrogenase2          | Zm00001d035156  | GCGAATTCGTTACAGGACGG     | Reverse |
| <i>α-tubulin</i> - tubulin α-3 chain                              | Zm00001d013367  | GCGCACCATCCAGTTCGT       | Forward |
| <i>α-tubulin</i> - tubulin α-3 chain                              | Zm00001d013367  | CTGGTAGTTGATTCCGCACTTG   | Reverse |
| <i>TUB1</i> - β tubulin1                                          | Zm00001eb000490 | TCGTGGGTGTGTTTCGTTTC     | Forward |
| <i>TUB1</i> - β tubulin1                                          | Zm00001eb000490 | CCAAAGCGCAACAGGGTATT     | Reverse |
| <i>ELFA2</i> - elongation factor alpha2                           | Zm00001eb285220 | GCTGAGCGTGAGAGAGGTAT     | Forward |
| <i>ELFA2</i> - elongation factor alpha2                           | Zm00001eb285220 | TGATGAAGTCACGGTGTCCA     | Reverse |
| <i>MHA2</i> - plasma-membrane H <sup>+</sup> -ATPase isoform MHA2 | Zm00001d002006  | GCTCATTGAGAAGGCCGATG     | Forward |
| <i>MHA2</i> - plasma-membrane H <sup>+</sup> -ATPase isoform MHA2 | Zm00001d002006  | CAGCAATACCGATGTCAGCC     | Reverse |
| <i>14-3-3 protein isoform GF14-6</i>                              | Zm00001d003401  | TCGACAAGGACGACCGAC       | Forward |
| <i>14-3-3 protein isoform GF14-6</i>                              | Zm00001d003401  | CATCTCCTCGTACCTCTCCG     | Reverse |
| <i>14-3-3 protein isoform GF14-12</i>                             | Zm00001d025617  | TGCAATGTGATCTGGACCCT     | Forward |
| <i>14-3-3 protein isoform GF14-12</i>                             | Zm00001d025617  | CTGAAACGAGGTGGGGGAT      | Reverse |
| <i>RBOH1</i> - respiratory burst oxidase1                         | Zm00001eb148780 | ACCTGACCAGCGTGATGAA      | Forward |
| <i>RBOH1</i> - respiratory burst oxidase1                         | Zm00001eb148780 | TGTGTTCAATCTTGCTGCC      | Reverse |
| <i>SOD1</i> - superoxide dismutase1                               | Zm00001eb008850 | TTCACTTCTTCGAGGACCCC     | Forward |
| <i>SOD1</i> - superoxide dismutase1                               | Zm00001eb008850 | CATTGGTAGTGTGCGCCGAAG    | Reverse |
| <i>CAT1</i> - catalase1                                           | Zm00001d014848  | ACCCATGAACACCGTACCAT     | Forward |
| <i>CAT1</i> - catalase1                                           | Zm00001d014848  | TCGATCTTACATGCTCGGCT     | Reverse |
| <i>APX1</i> - ascorbate peroxidase homolog                        | Zm00001eb397180 | GCCACAATGCATCCTACGAG     | Forward |
| <i>APX1</i> - ascorbate peroxidase homolog                        | Zm00001eb397180 | GACGACCACAATAGCTGCTG     | Reverse |
| <i>GSR1</i> - glutathione reductase1                              | Zm00001eb004790 | TTGGAATACACCGGCAGAGT     | Forward |
| <i>GSR1</i> - glutathione reductase1                              | Zm00001eb004790 | GAAAATAGCTCGGCGGACAG     | Reverse |
| <i>CKO3</i> - cytokinin oxidase 3                                 | Zm00001eb363220 | GAGCTCCATCCGAGATTTG      | Forward |
| <i>CKO3</i> - cytokinin oxidase 3                                 | Zm00001eb363220 | AGACGGTGCTGAAGAAAGGA     | Reverse |
| <i>CRR1</i> - cytokinin response regulator1                       | Zm00001eb066570 | CGTCGTCATCATGTCATCGG     | Forward |
| <i>CRR1</i> - cytokinin response regulator1                       | Zm00001eb066570 | CCTAACATAGCACCACACGC     | Reverse |
| <i>PIN1</i> - PIN-formed protein1                                 | Zm00001eb372180 | CAGTCATCTTCGGCATGCTC     | Forward |
| <i>PIN1</i> - PIN-formed protein1                                 | Zm00001eb372180 | CCCCTAGTCTGTCTCCTCT      | Reverse |

| Gene                                              | Locus           | Sequence 5' → 3'      |         |
|---------------------------------------------------|-----------------|-----------------------|---------|
| <i>PIN3</i> - PIN-formed protein3                 | Zm00001eb194640 | GTTGTACGTGGCGATGATCC  | Forward |
| <i>PIN3</i> - PIN-formed protein3                 | Zm00001eb194640 | CAGGTTTCATGGTGTAGGGGT | Reverse |
| <i>ABP1</i> - auxin binding protein1              | Zm00001eb137840 | GTCTGGGATGAGGACTGCTT  | Forward |
| <i>ABP1</i> - auxin binding protein1              | Zm00001eb137840 | TTTCGCGAGCCACAATACAG  | Reverse |
| <i>GA20OX3</i> - gibberellin 20-oxidase3          | Zm00001eb145600 | GGTGATCAGGTGGCAGACAT  | Forward |
| <i>GA20OX3</i> - gibberellin 20-oxidase3          | Zm00001eb145600 | AAGAAAAGAACACCAGGCCG  | Reverse |
| <i>GA2OX1</i> - gibberellin 2-oxidase1            | Zm00001eb282550 | AACCACTACCCTCCACCATG  | Forward |
| <i>GA2OX1</i> - gibberellin 2-oxidase1            | Zm00001eb282550 | ATCGTTTGATCGGAGCAAGC  | Reverse |
| <i>EREB10</i> - AP2-EREBP-transcription factor 10 | Zm00001eb250540 | TGTTGCACACCTAGCTAGCT  | Forward |
| <i>EREB10</i> - AP2-EREBP-transcription factor 10 | Zm00001eb250540 | TGTACTCCTGTTGTCGCCAT  | Reverse |
| <i>BRL1</i> - bri1-like receptor kinase1          | Zm00001eb309030 | AACAACCTCATCTGGCTGGA  | Forward |
| <i>BRL1</i> - bri1-like receptor kinase1          | Zm00001eb309030 | TGCTTCCTGAAACAATGCC   | Reverse |
| <i>BSK1</i> - brassinosteroid-signaling kinase1   | Zm00001eb402560 | ACACCCTCTTCTCCCATGG   | Forward |
| <i>BSK1</i> - brassinosteroid-signaling kinase1   | Zm00001eb402560 | AAGCAAAGTCCCCACGTTTC  | Reverse |
| <i>CDPK1</i> - calcium dependent protein kinase1  | Zm00001eb227950 | CTTGTTTGATGCCCCCTCC   | Forward |
| <i>CDPK1</i> - calcium dependent protein kinase1  | Zm00001eb227950 | TCAACAAAAGACTGCCACG   | Reverse |
| <i>CAL1</i> - calmodulin1                         | Zm00001eb291330 | CATCCTCGACATGTTCTGCG  | Forward |
| <i>CAL1</i> - calmodulin1                         | Zm00001eb291330 | GTAGAGGTACGGCAGGTTGA  | Reverse |
| <i>CAP1</i> - calcium pump1                       | Zm00001eb355420 | GCGCTAACATTTGACTCCGT  | Forward |
| <i>CAP1</i> - calcium pump1                       | Zm00001eb355420 | TTGTTTGGCGTTAGGGTGG   | Reverse |
| <i>CAX1</i> - calcium exchanger1                  | Zm00001eb345450 | ACTGTGGGTGGACTGTTGAA  | Forward |
| <i>CAX1</i> - calcium exchanger1                  | Zm00001eb345450 | GCCACCAAAGAAAAGGGAGG  | Reverse |
| <i>KCH1</i> - potassium channel 1                 | Zm00001eb158420 | GGTCGCAAGAGATCTAGCT   | Forward |
| <i>KCH1</i> - potassium channel 1                 | Zm00001eb158420 | TCGAGGGCTCACTGTTGAAT  | Reverse |
| <i>PIP1b</i> - plasma membrane intrinsic protein1 | Zm00001eb249940 | CTACACCGTCTTCTCAGCCA  | Forward |
| <i>PIP1b</i> - plasma membrane intrinsic protein1 | Zm00001eb249940 | AGTAATGGGGATGGTGGCAA  | Reverse |
| <i>SLAC1</i> - slow anion channel-associated1     | Zm00001eb073420 | ATGGGATTCGGCAGACAGAA  | Forward |
| <i>SLAC1</i> - slow anion channel-associated1     | Zm00001eb073420 | GAAATATGGCGCCACTGGAG  | Reverse |
| <i>SUS1</i> - sucrose synthase1                   | Zm00001eb392880 | ACCACATCGACCCTTACCAG  | Forward |
| <i>SUS1</i> - sucrose synthase1                   | Zm00001eb392880 | ACTTCTCCTCGATACGCTGG  | Reverse |
| <i>IDH1</i> - isocitrate dehydrogenase1           | Zm00001eb359420 | CGACTTCGCTCTCAAACCTCG | Forward |
| <i>IDH1</i> - isocitrate dehydrogenase1           | Zm00001eb359420 | TCGGTGTTCAAGTAATGGCT  | Reverse |
| <i>MDH1</i> - malate dehydrogenase1               | Zm00001eb344340 | TCTGCCACTCTTCTCACAGG  | Forward |
| <i>MDH1</i> - malate dehydrogenase1               | Zm00001eb344340 | CAACCTCTGTCCCACCATCT  | Reverse |
| <i>PEP1</i> - phosphoenolpyruvate carboxylase1    | Zm00001eb383680 | AGATGTACAACGAGTGGCCA  | Forward |

| Gene                                            | Locus           | Sequence 5' → 3'      |         |
|-------------------------------------------------|-----------------|-----------------------|---------|
| <i>PEP1</i> - phosphoenolpyruvate carboxylase1  | Zm00001eb383680 | CCACAAGCAGCTCGTCATAC  | Reverse |
| <i>GOGAT1</i> - glutamate synthase1             | Zm00001eb360480 | GGAAACTGGGCGGAAC TTT  | Forward |
| <i>GOGAT1</i> - glutamate synthase1             | Zm00001eb360480 | CTCTCAGTGTTGCGACGATG  | Reverse |
| <i>ZmISCA1</i> – iron sulfur cluster assembly 1 | Zm00001eb126830 | TTCTTGTGTCTGTTGCGTCTG | Forward |
| <i>ZmISCA1</i> – iron sulfur cluster assembly 1 | Zm00001eb126830 | CGAGGTCTTAAATCGCGAGC  | Reverse |
| <i>ZmISCA2</i> – iron sulfur cluster assembly 2 | Zm00001d049325  | ACCAGATACCGAAGCCGTAG  | Forward |
| <i>ZmISCA2</i> – iron sulfur cluster assembly 2 | Zm00001d049325  | GTAAACGGTGGCGTGATGAG  | Reverse |
| <i>CRY1</i> - cryptochrome1                     | Zm00001eb244770 | TCACTGCAGATTTTGGCCAC  | Forward |
| <i>CRY1</i> - cryptochrome1                     | Zm00001eb244770 | CCGTCAACTGTCTCTTCCCT  | Reverse |
| <i>CRY2</i> - cryptochrome2                     | Zm00001eb081200 | GTCCTGTTCCCTCAAGAGCT  | Forward |
| <i>CRY2</i> - cryptochrome2                     | Zm00001eb081200 | GACCTCTGTTCCAGCTCTGT  | Reverse |
| <i>PHYA1</i> - phytochromeA1                    | Zm00001eb055460 | AAGAGCAGATGAGGCAGGTT  | Forward |
| <i>PHYA1</i> - phytochromeA1                    | Zm00001eb055460 | CAGCACAAACTCAGCCATGT  | Reverse |
| <i>PHYB1</i> - phytochromeB1                    | Zm00001eb014850 | ACCCACCTAACTTTCTCGG   | Forward |
| <i>PHYB1</i> - phytochromeB1                    | Zm00001eb014850 | GTGCACTGAAAACAGCCTCA  | Reverse |
